# Supplementary material for: Porcine Model of Hemophilia A
Source: PLoS One. 2012 Nov 28;7(11):e49450. doi: 10.1371/journal.pone.0049450 (PMC3509096; doi:10.1371/journal.pone.0049450)
Supplement: Table S1 — Sequences of primers used in this study. (DOC) [file pone.0049450.s001.doc]

Supplementary data:

Porcine Model of Hemophilia A

Yuji Kashiwakura*1, Jun Mimuro*1§, Akira Onishi*2, Masaki Iwamoto*2,3, Seiji Madoiwa1, Daiichiro Fuchimoto2, Shunichi Suzuki2, Misae Suzuki2, Shoichiro Sembon2, Akira Ishiwata1, Atsushi Yasumoto1, Asuka Sakata1, Tsukasa Ohmori1, Michiko Hashimoto3, Satoko Yazaki3, Yoichi Sakata1§

1Research Division of Cell and Molecular Medicine, Center for Molecular Medicine,

Jichi Medical University, Tochigi-ken 329-0498, Japan.

2Transgenic Animal Research Center, National Institute of Agrobiological Sciences, Tsukuba, Ibaraki-ken 305-8602, Japan.

3Prime Tech Ltd., Tsuchiura, Ibaraki-ken, 300-0841, Japan

*These authors contributed equally to this work.

§Correspondence should be addressed to Jun Mimuro (mimuro-j@jichi.ac.jp) or Yoichi Sakata (yoisaka@jichi.ac.jp)

**Supplementary Table**

**Table S1. Primer sequences**

**Primers for construction of the gene-targeting vector**

Exon 14F; 5’-CAGGACTCGAGAAGAGAACCCGACACTATTTCATTGCTGC-3’

Intron 14F: 5’-CCGCTCGAGGAGTTCCTGCTATGGCACG-3’

Exon 21R: 5’-CTCAGATTGATCCGGAATAATGAAGTCTGGCCAGC-3’

Exon 16F: 5’-CTCTAGATCCGGATGATCAGGAGCAAGGGGC-3’

Intron 21R: 5’-GCCTCTAGATCTGCGACCTACACCACAGCTC-3’

Exon 22R: 5’-CTCTAGAGGTAACTCTGCCAGTTCCTCCCGTCAAGAC-3’

**Primers for PCR Screening for *F8* recombination**

Exon 14 sF: 5’-GCTTTATTAACTGAGAATAGGGCATCTGC-3’

Exon 18 sR: 5’-GCCAGGGAGTGTATCCATCACATAG-3’

Neo sR: 5’-CTTCCCGCTTCAGTGACAACGTCGAGCACAG-3’

Neo sF: 5’-CGCCTTCTTGACGAGTTCTTCTG-3’

Exon 22 sR: 5’-TAAGGTGCCCGTGGAATTCCCTC-3’

**Primers for RT-PCR detection of porcine *F8* mRNA**

Exon 14 F: 5’-CGACACTATTTCATTGCTGC-3’

Exon 16Δ R: 5’-CCGGATAAGAAATAAGGCTC-3’

Exon 18 F: 5’-GTACAATCTCTATCCGGGTG-3’

Exon 22 R: 5’-GGTAACTCTGCCAGTTCCT-3’

GAPDH F: 5’-AAGCTCATTTCCTCGTACGAC-3’

GAPDH R: 5’-GGAGGCCATGTGGACCAT-3’

**Primers for the DIG-labeled probes**

Exon 14 F: 5’-GAAATCGAACAGGTCCAGG-3’

Exon 14 R: 5’-CAGAAGCTTGGAGGGAGTC-3’

Intron 21 F: 5’-TACAGCGCTTCCTTACCAC-3’

Exon 22 R: 5’-TAACTCTGCCAGTTCCTCC-3’
